# Supplementary material
Source: publisher site journal article supplement (https://kjim.org/upload/media/kjim-2024-122-Supplementary-Table-1.pdf)
Supplement: Supplementary file 1 [file kjim-2024-122-Supplementary-Table-1.pdf]

**Supplementary Table 1. Results of Fisher's stepwise discriminant analysis**

| Variable                   | Wilk's Lambda standard |                   |                | Standardized canonical discriminant function coefficients |
|----------------------------|------------------------|-------------------|----------------|-----------------------------------------------------------|
|                            | Lambda                 | Fisher exact test |                |                                                           |
|                            |                        | Statistic         | <i>p</i> value |                                                           |
| SWEmean                    | 0.733                  | 29.918            | < 0.001        | 0.542                                                     |
| Cortical hyperechogenicity | 0.617                  | 25.180            | < 0.001        | 0.489                                                     |
| Vascular pattern           | 0.546                  | 22.152            | < 0.001        | 0.475                                                     |
| Absence of lymphatic hilum | 0.507                  | 19.235            | < 0.001        | -0.384                                                    |

SWEmean, the mean value of shear wave elastography.
